# Supplementary material for: Trabecular bone scores in young HIV-infected men: a matched case-control study
Source: Springer Nature journal article supplement (doi:10.1186/s12891-020-3092-0), 2020-02-10

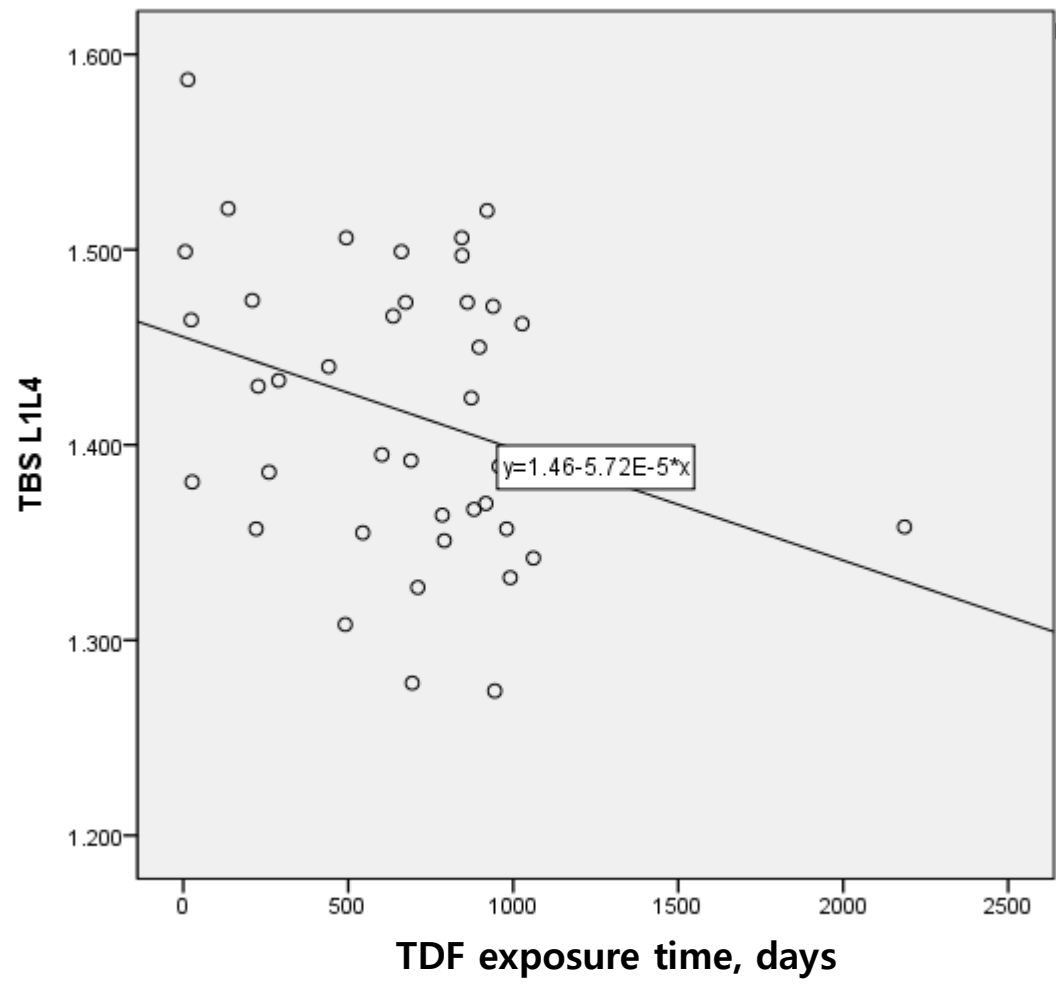

Supplement: MOESM1 [file 17666782]
